# Supplementary figures and images for: Effects of In Vitro Fermentation of Polysialic Acid and Sialic Acid on Gut Microbial Community Composition and Metabolites in Healthy Human
Source: Preprints.org preprint supplement (doi:10.20944/preprints202401.0484.v1), 2024-01-05

# PSA vs SA

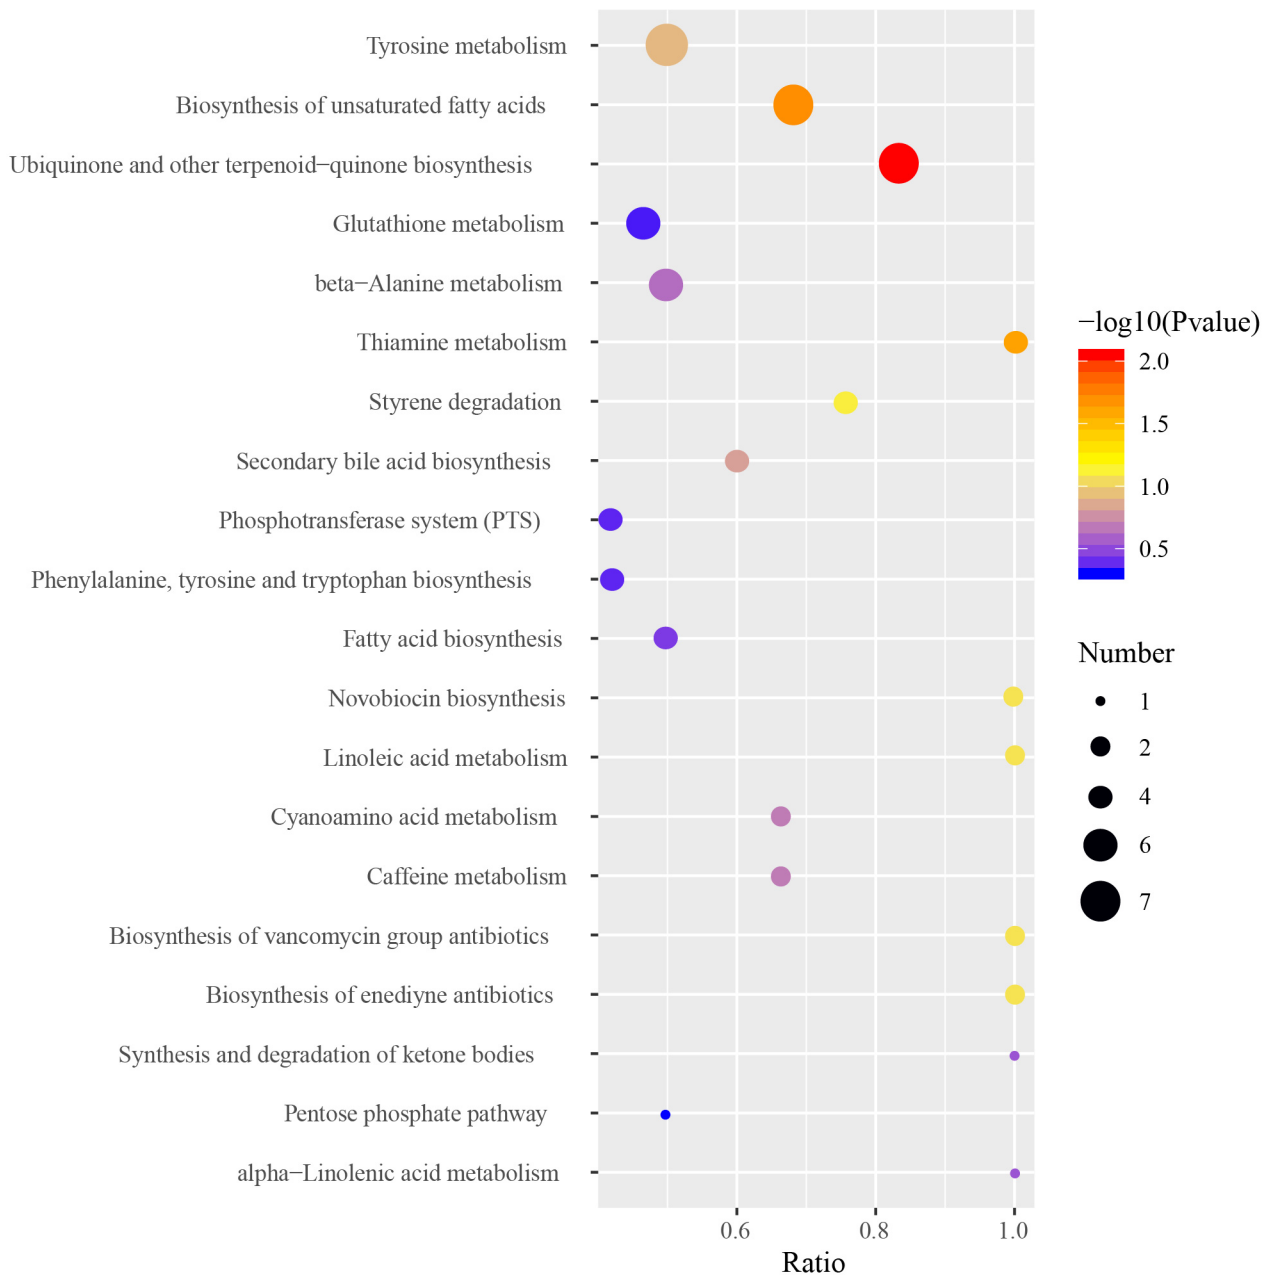

Supplement: Supplementary file 1 [file supplementary]

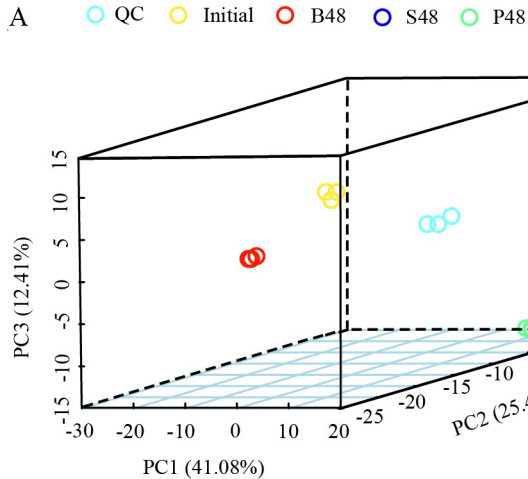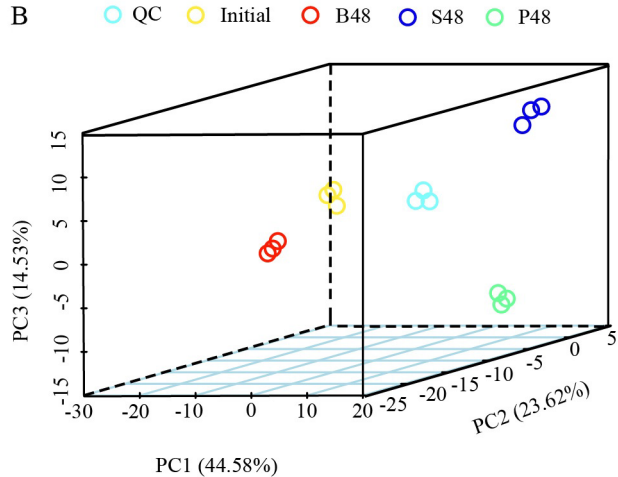

Supplement: Supplementary file 2 [file supplementary]

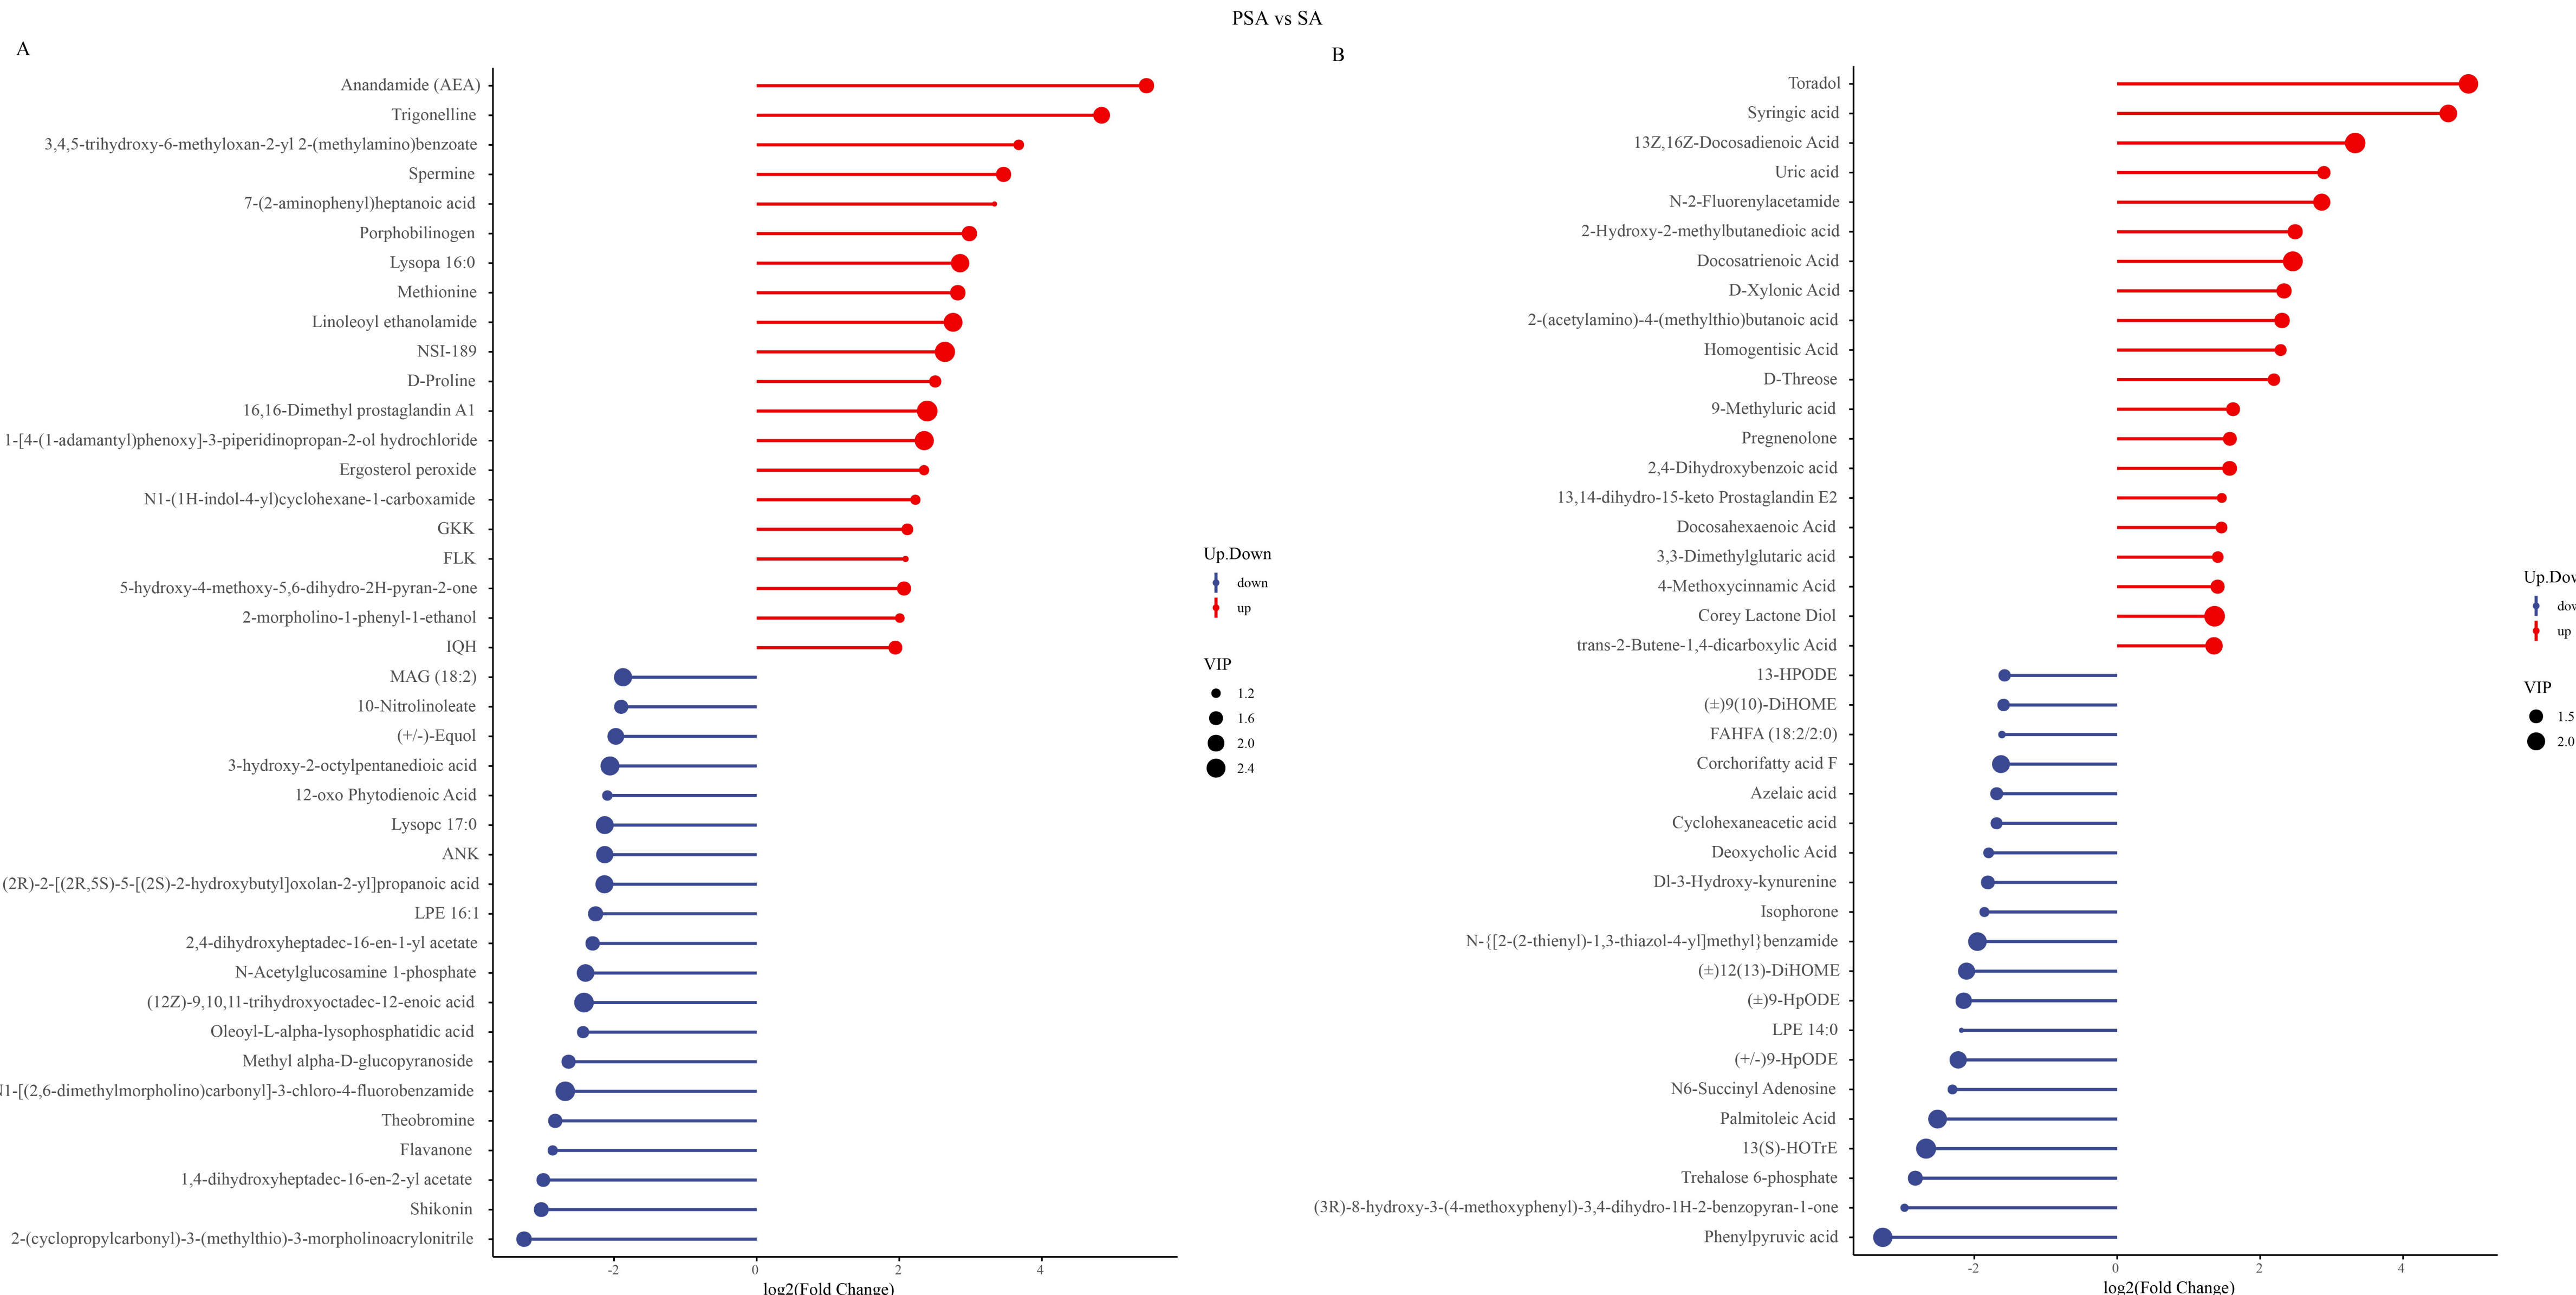

Supplement: Supplementary file 3 [file supplementary]

## NICOTINATE AND NICOTINAMIDE METABOLISM

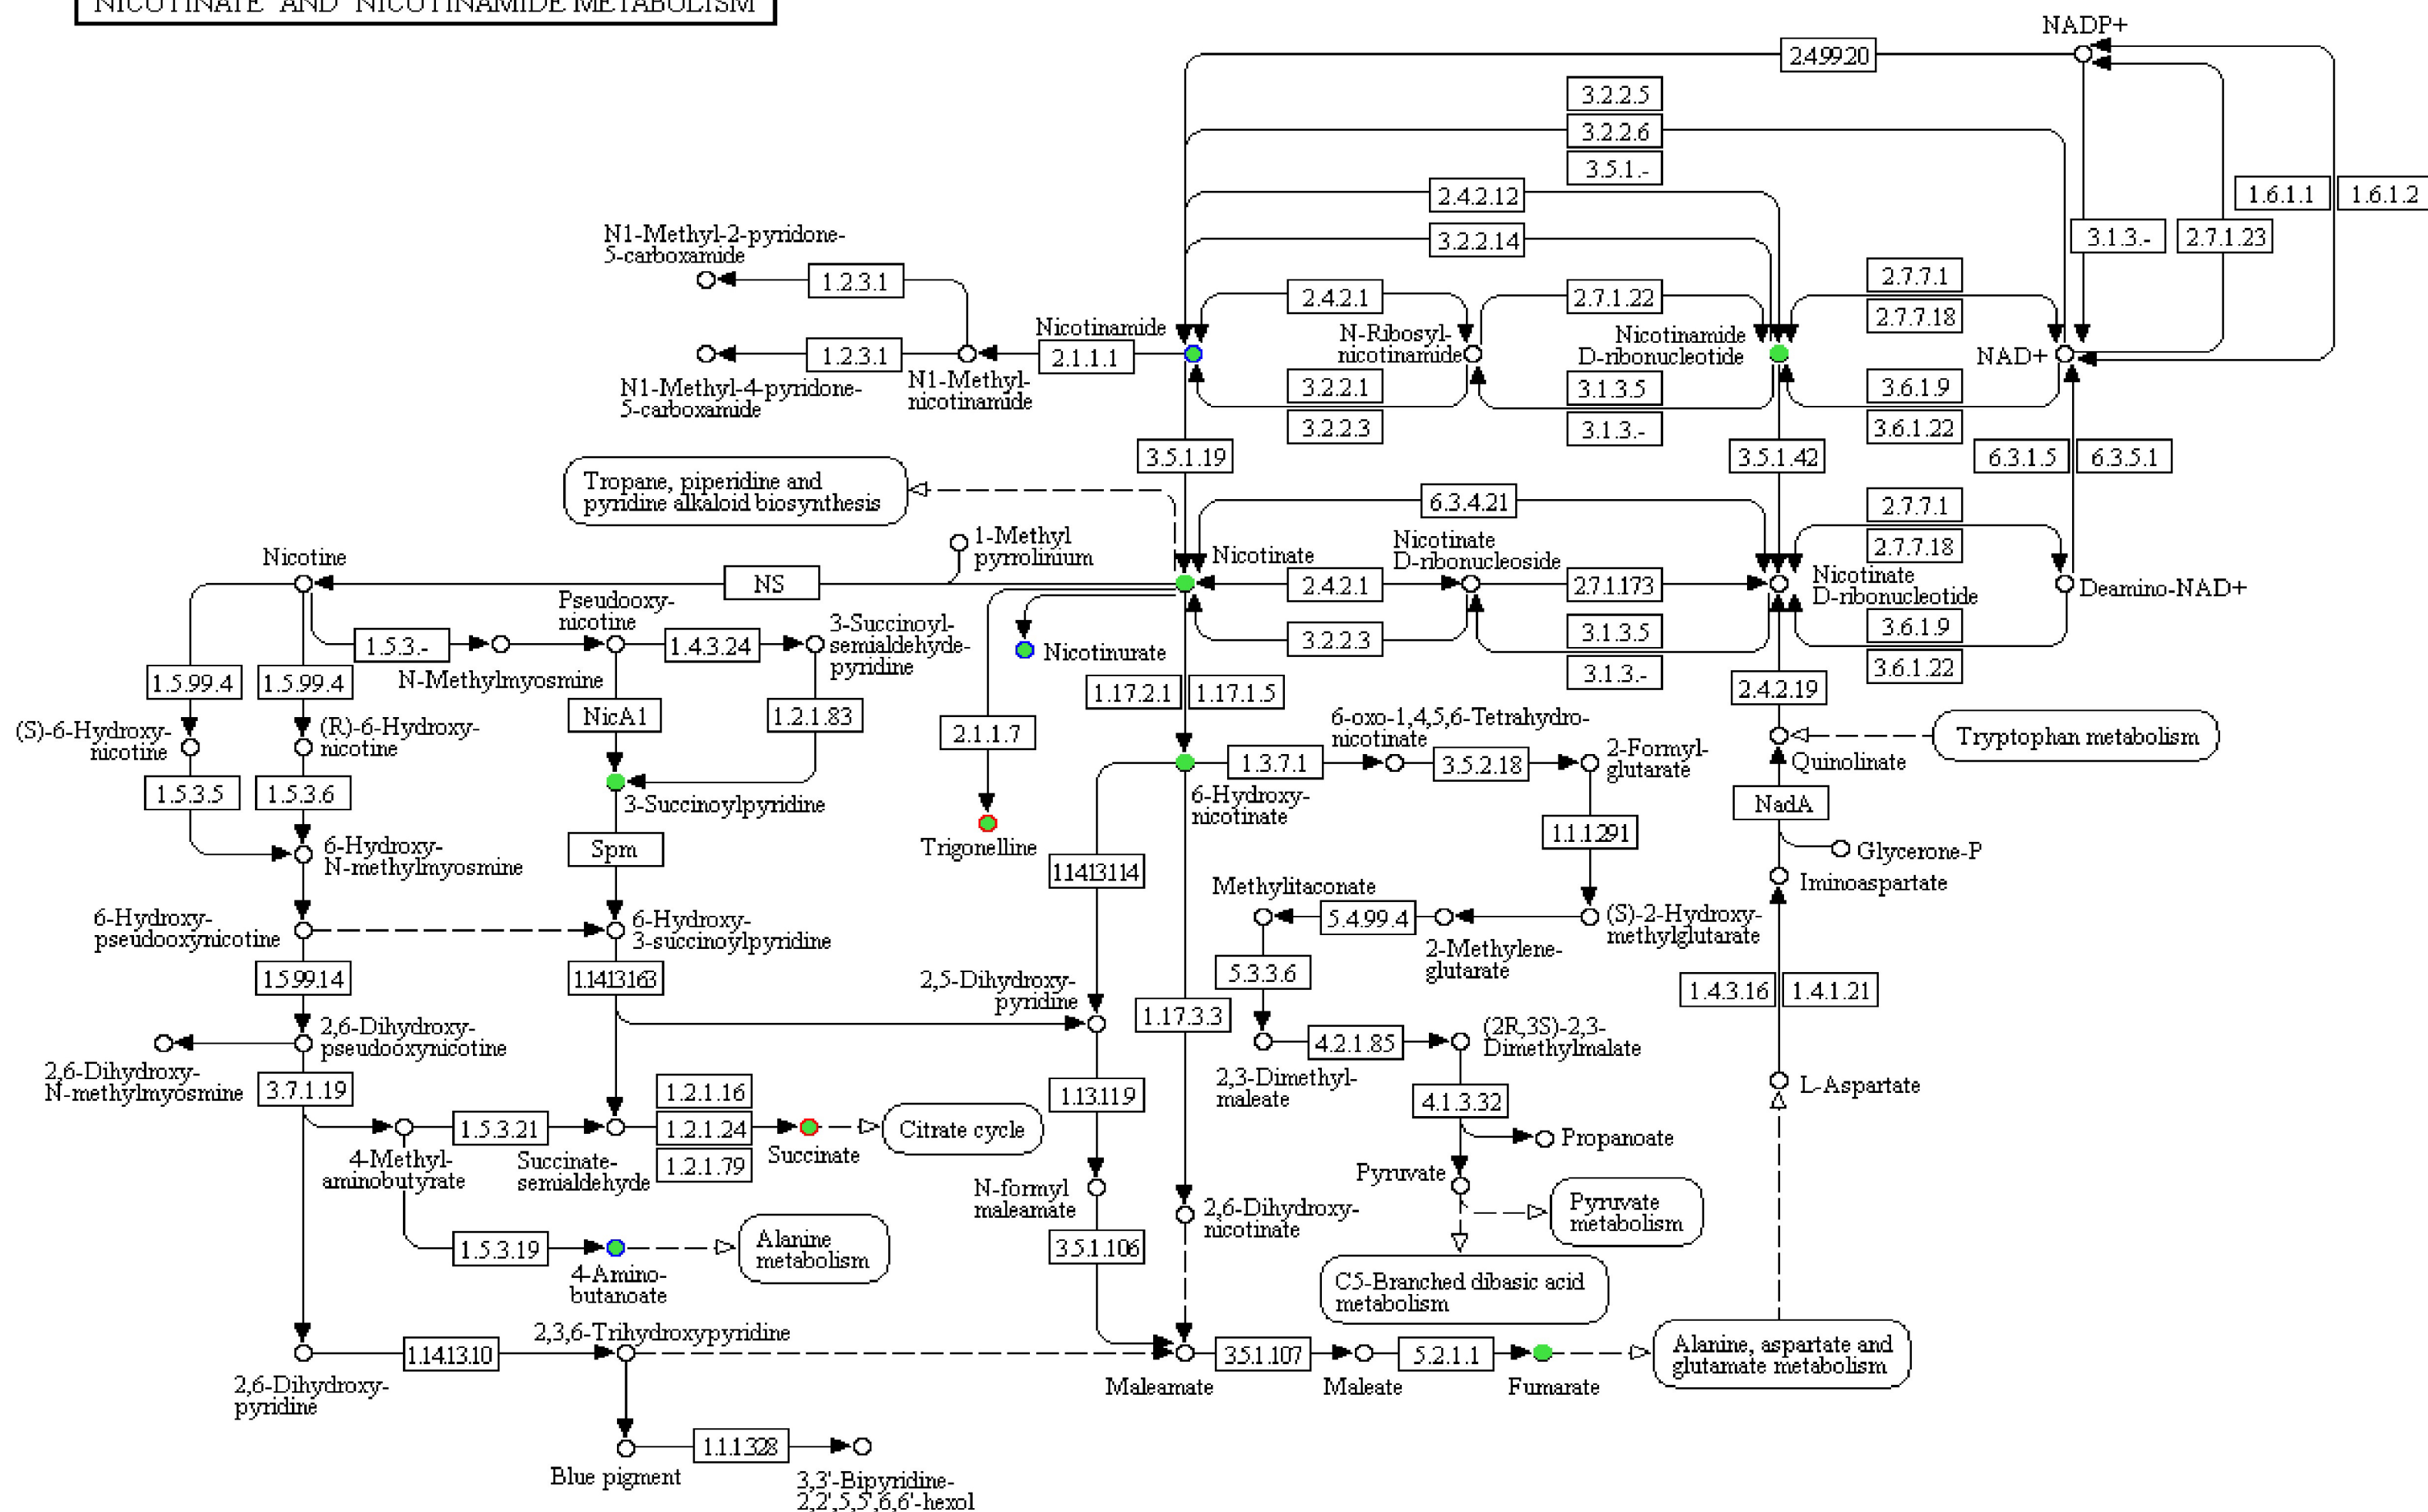

Supplement: Supplementary file 4 [file supplementary]

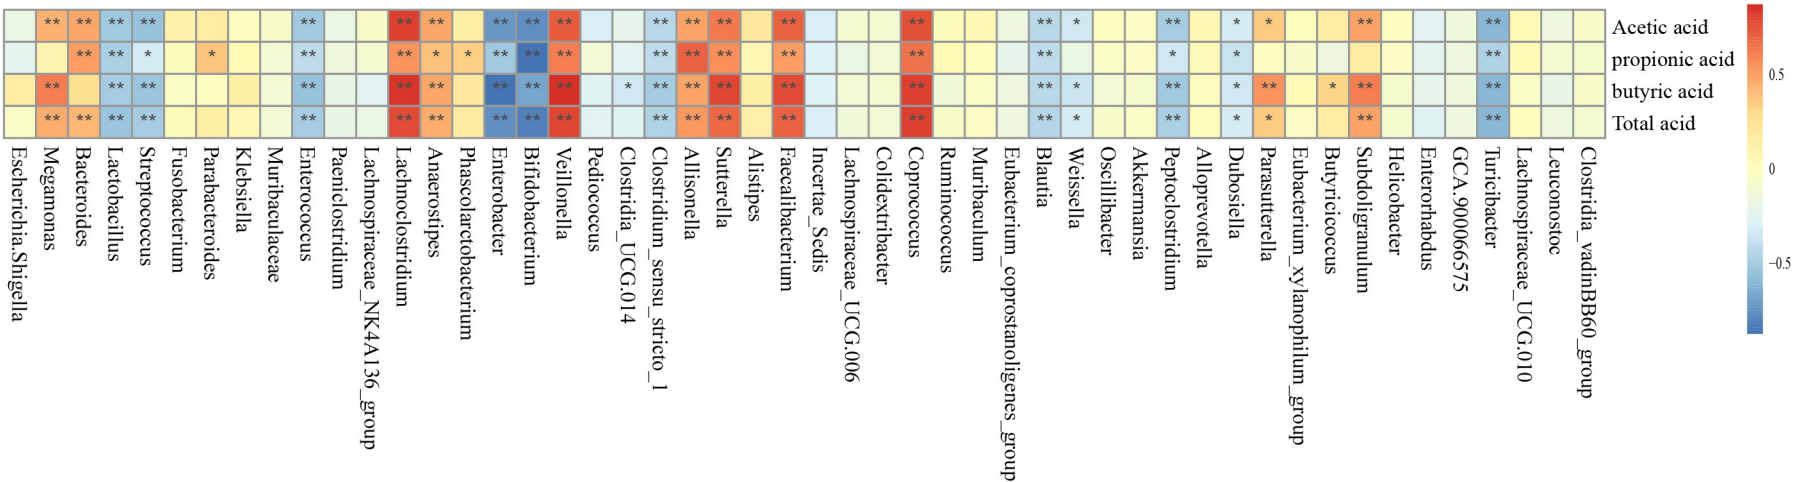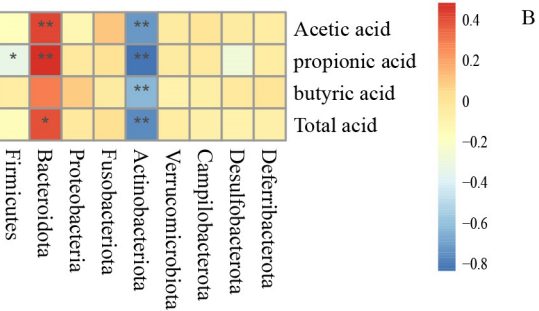

Supplement: Supplementary file 5 [file supplementary]

A

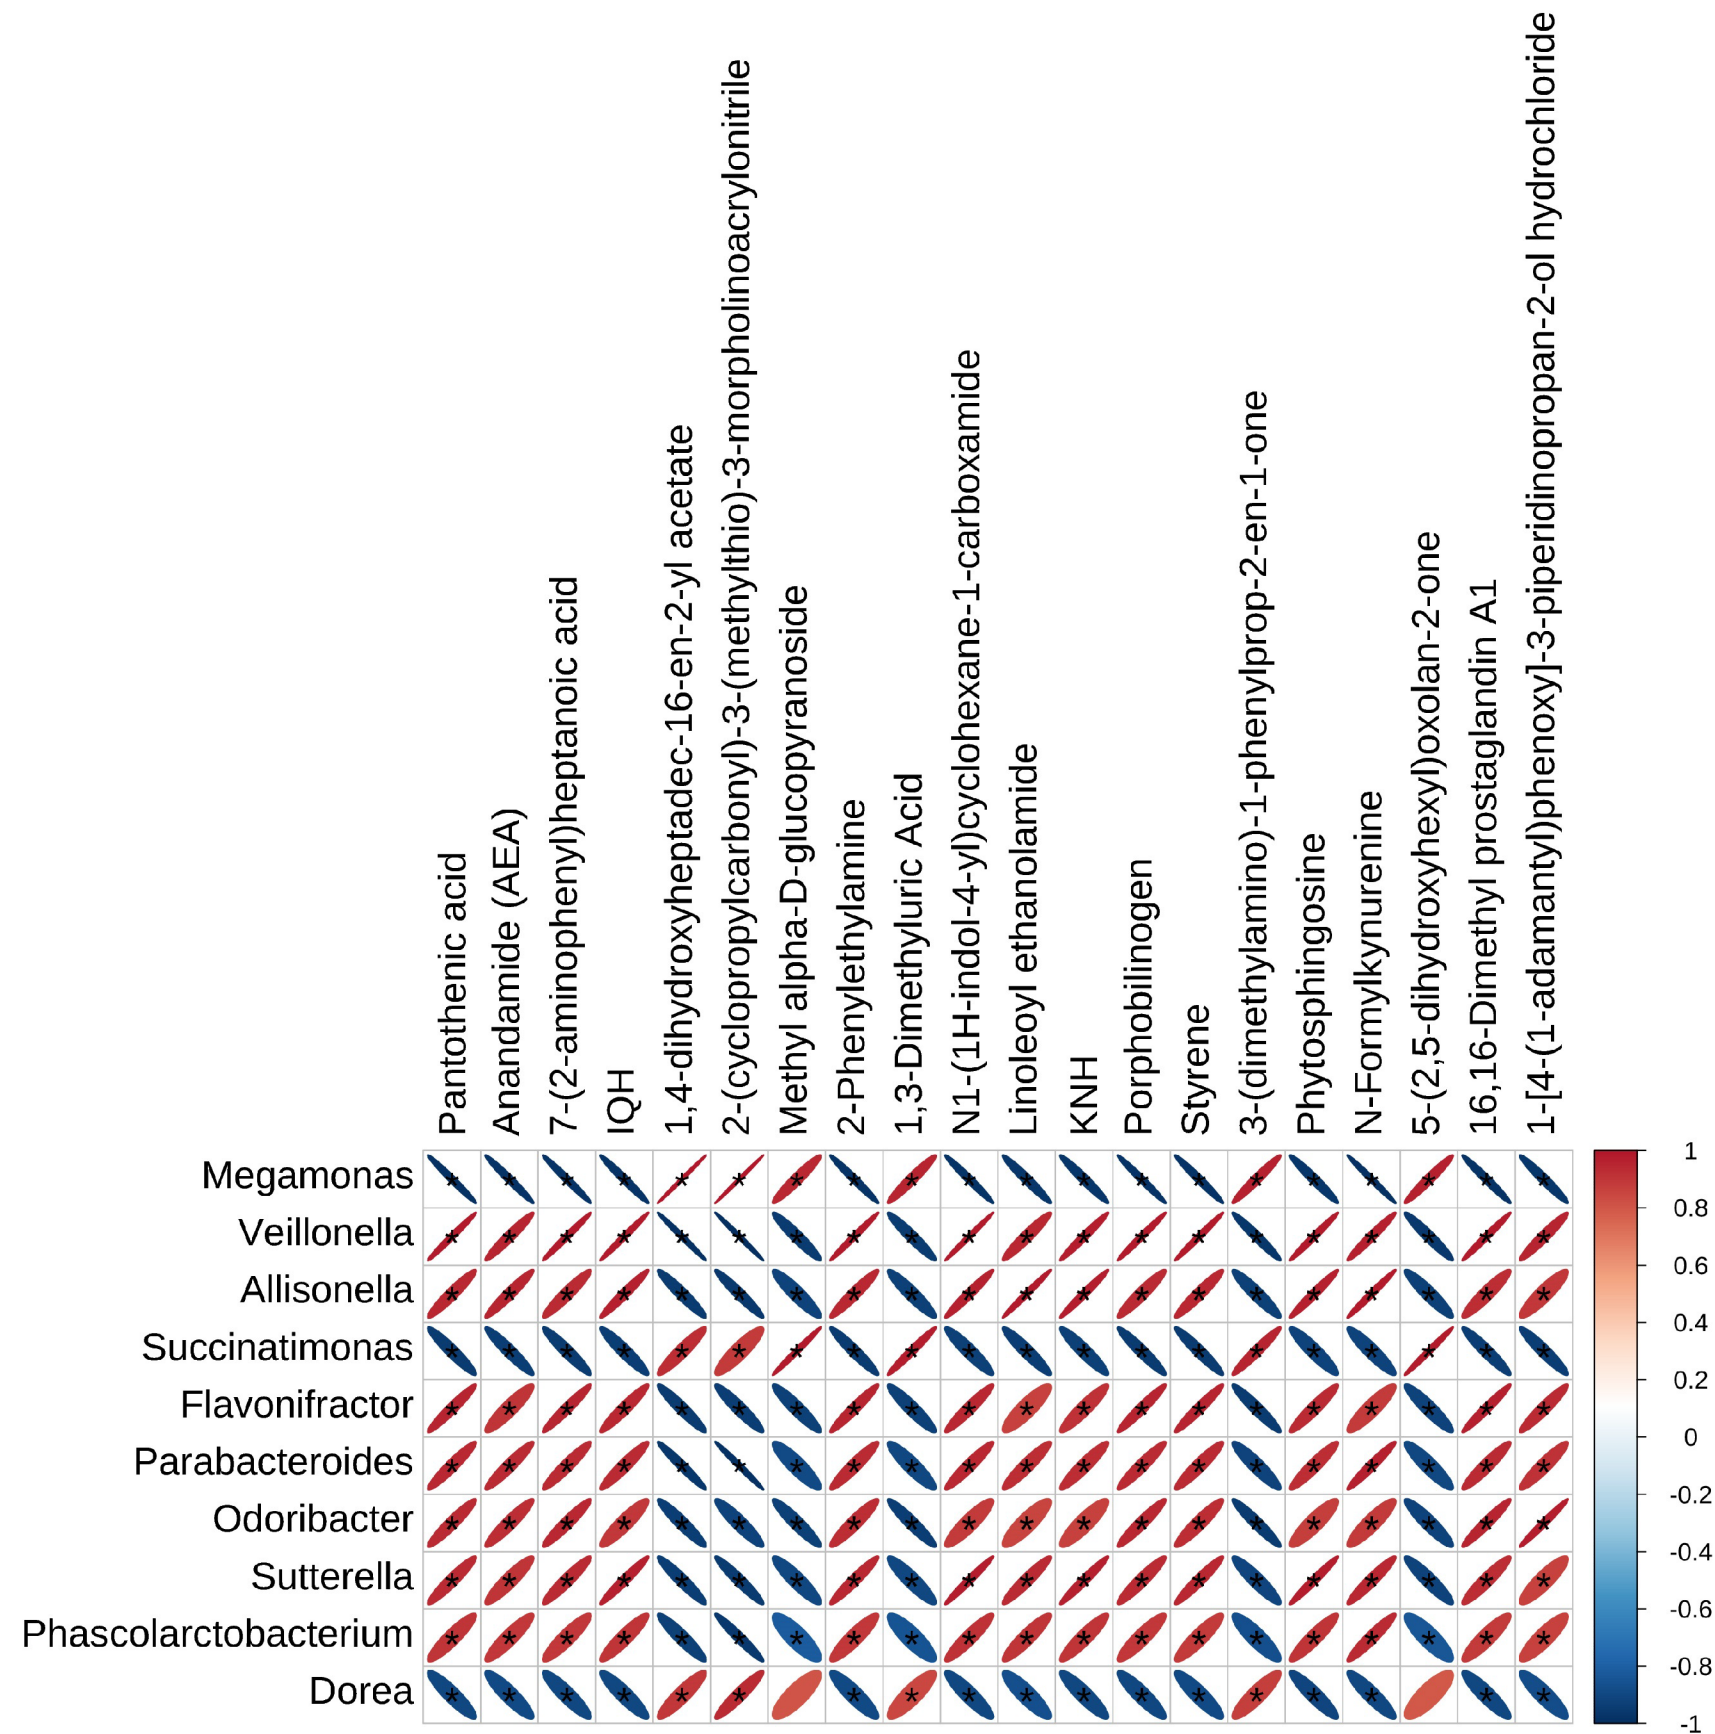

B

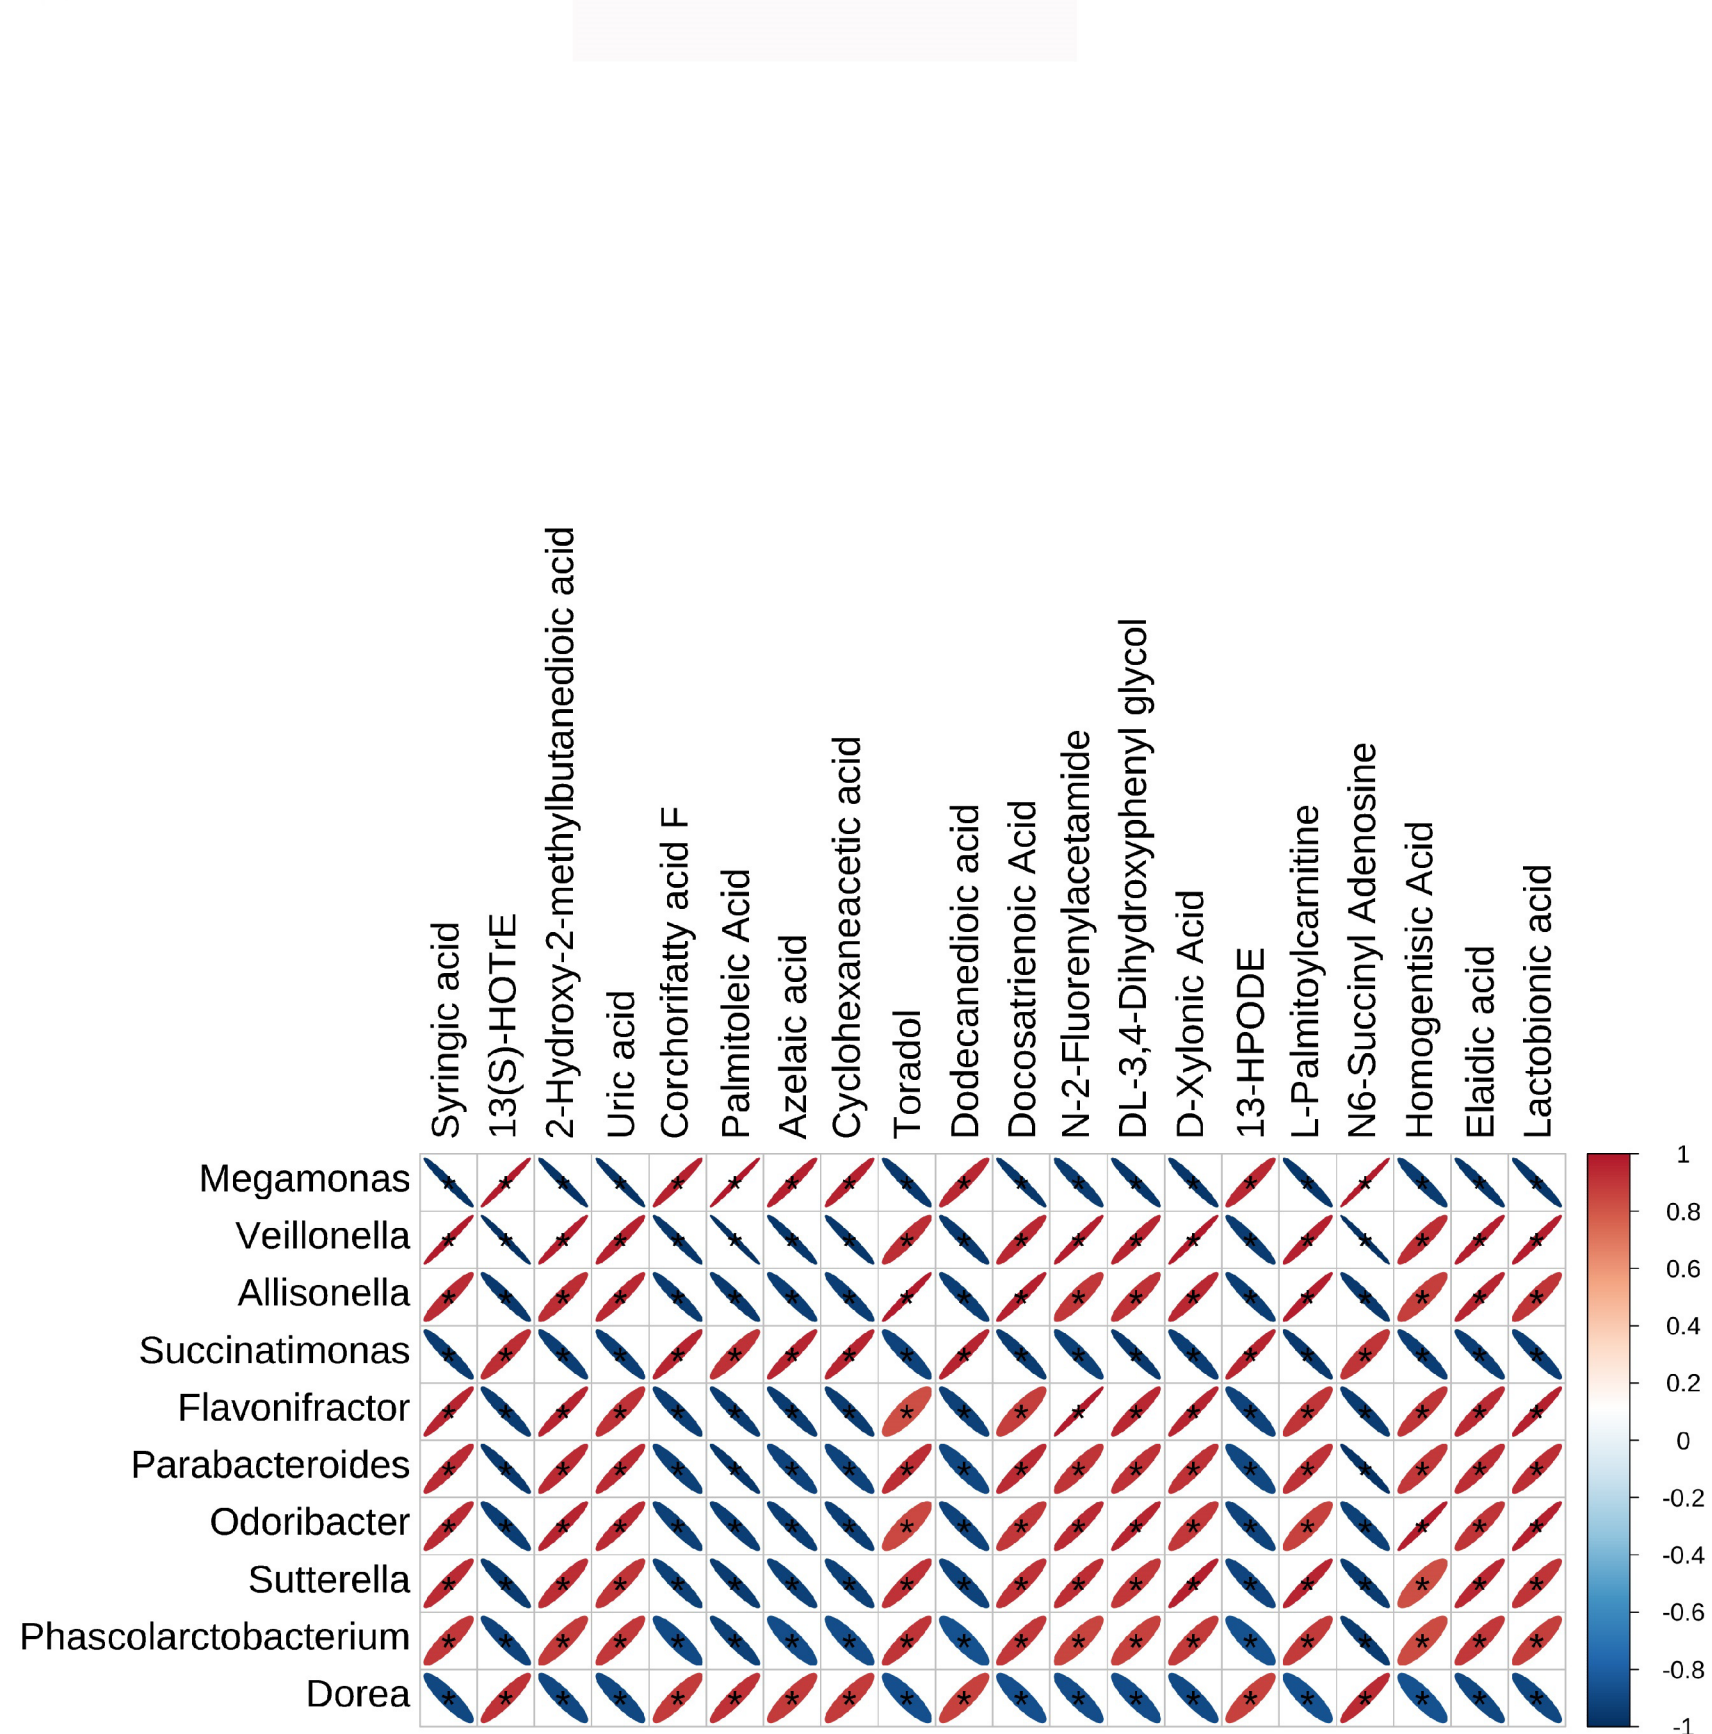

Supplement: Supplementary file 6 [file supplementary]

A

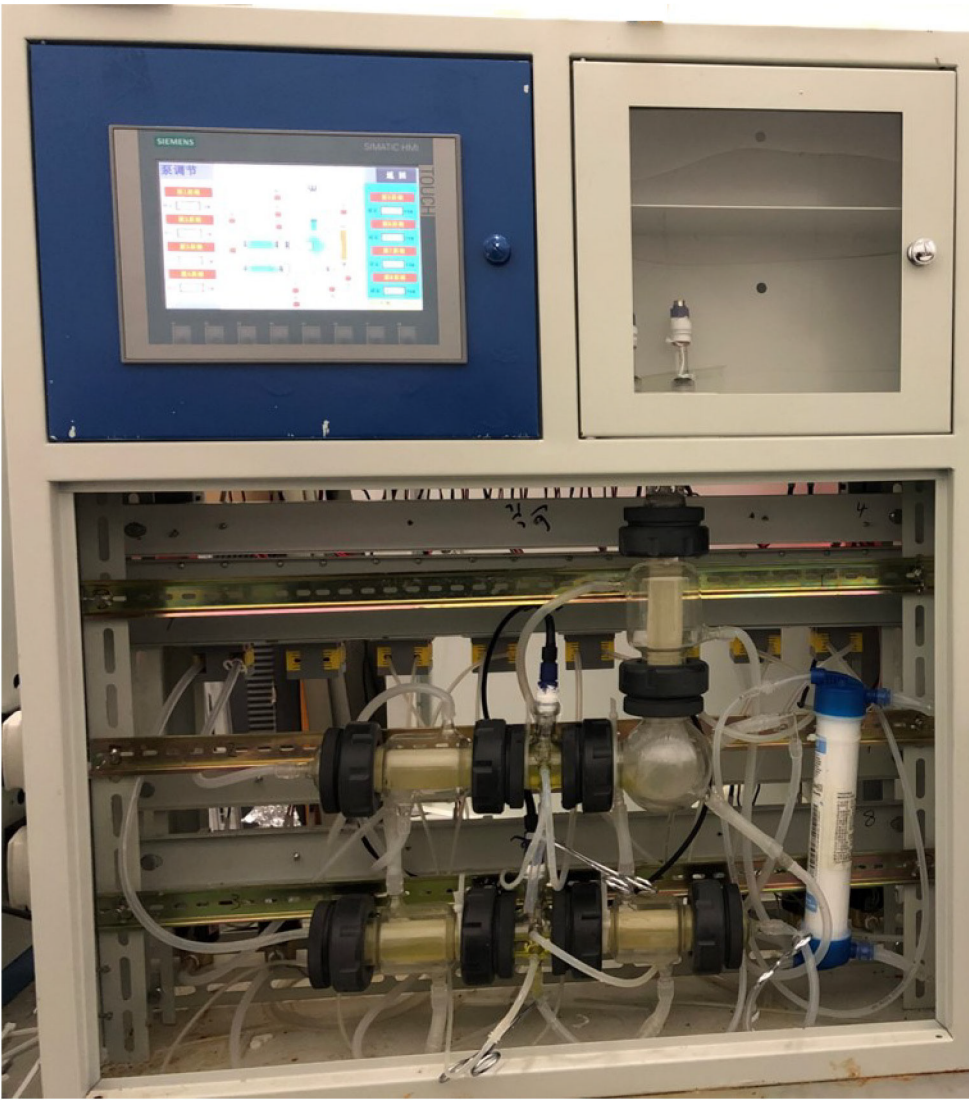

B

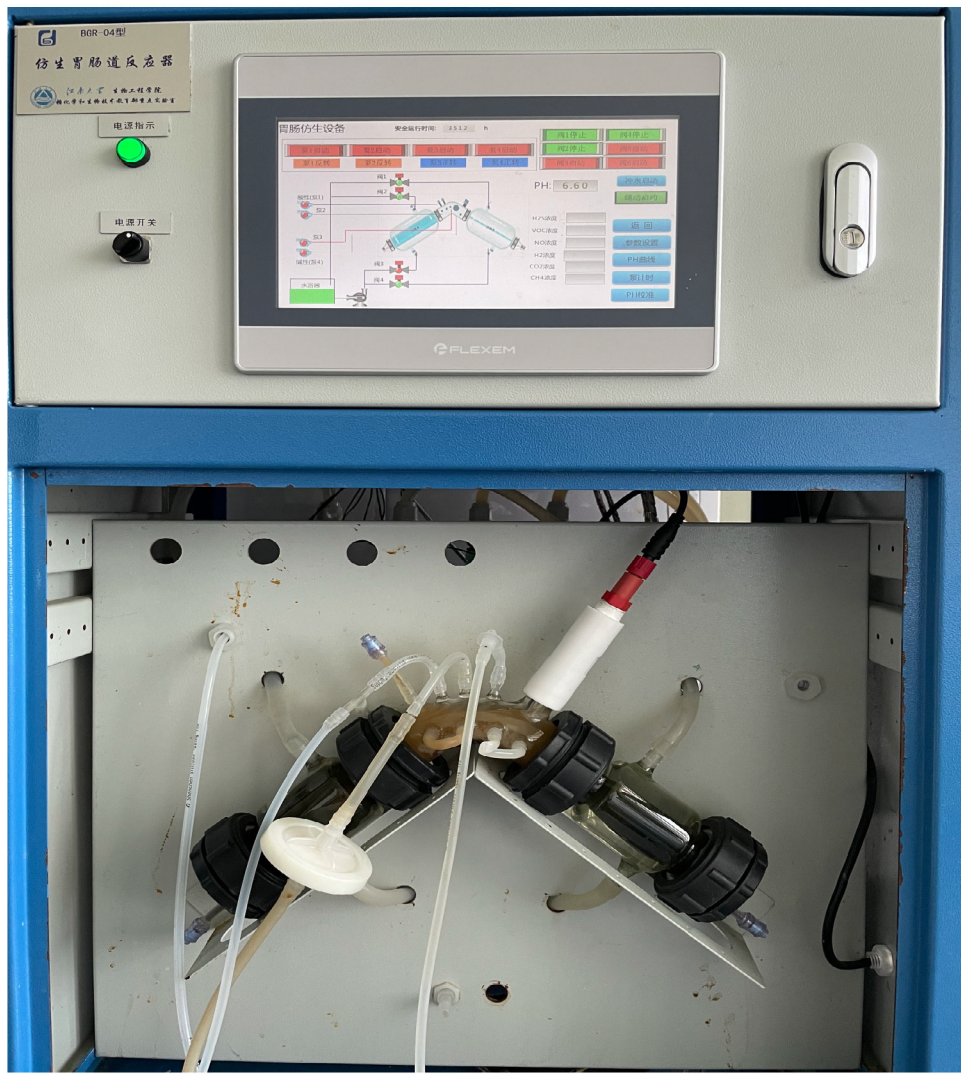

Supplement: Supplementary file 7 [file supplementary]

B

Up.Down

 down

 up

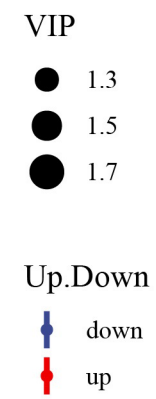

B

Up.Down

 down

 up



Supplement: Supplementary file 8 [file supplementary]

## HISTIDINE METABOLISM

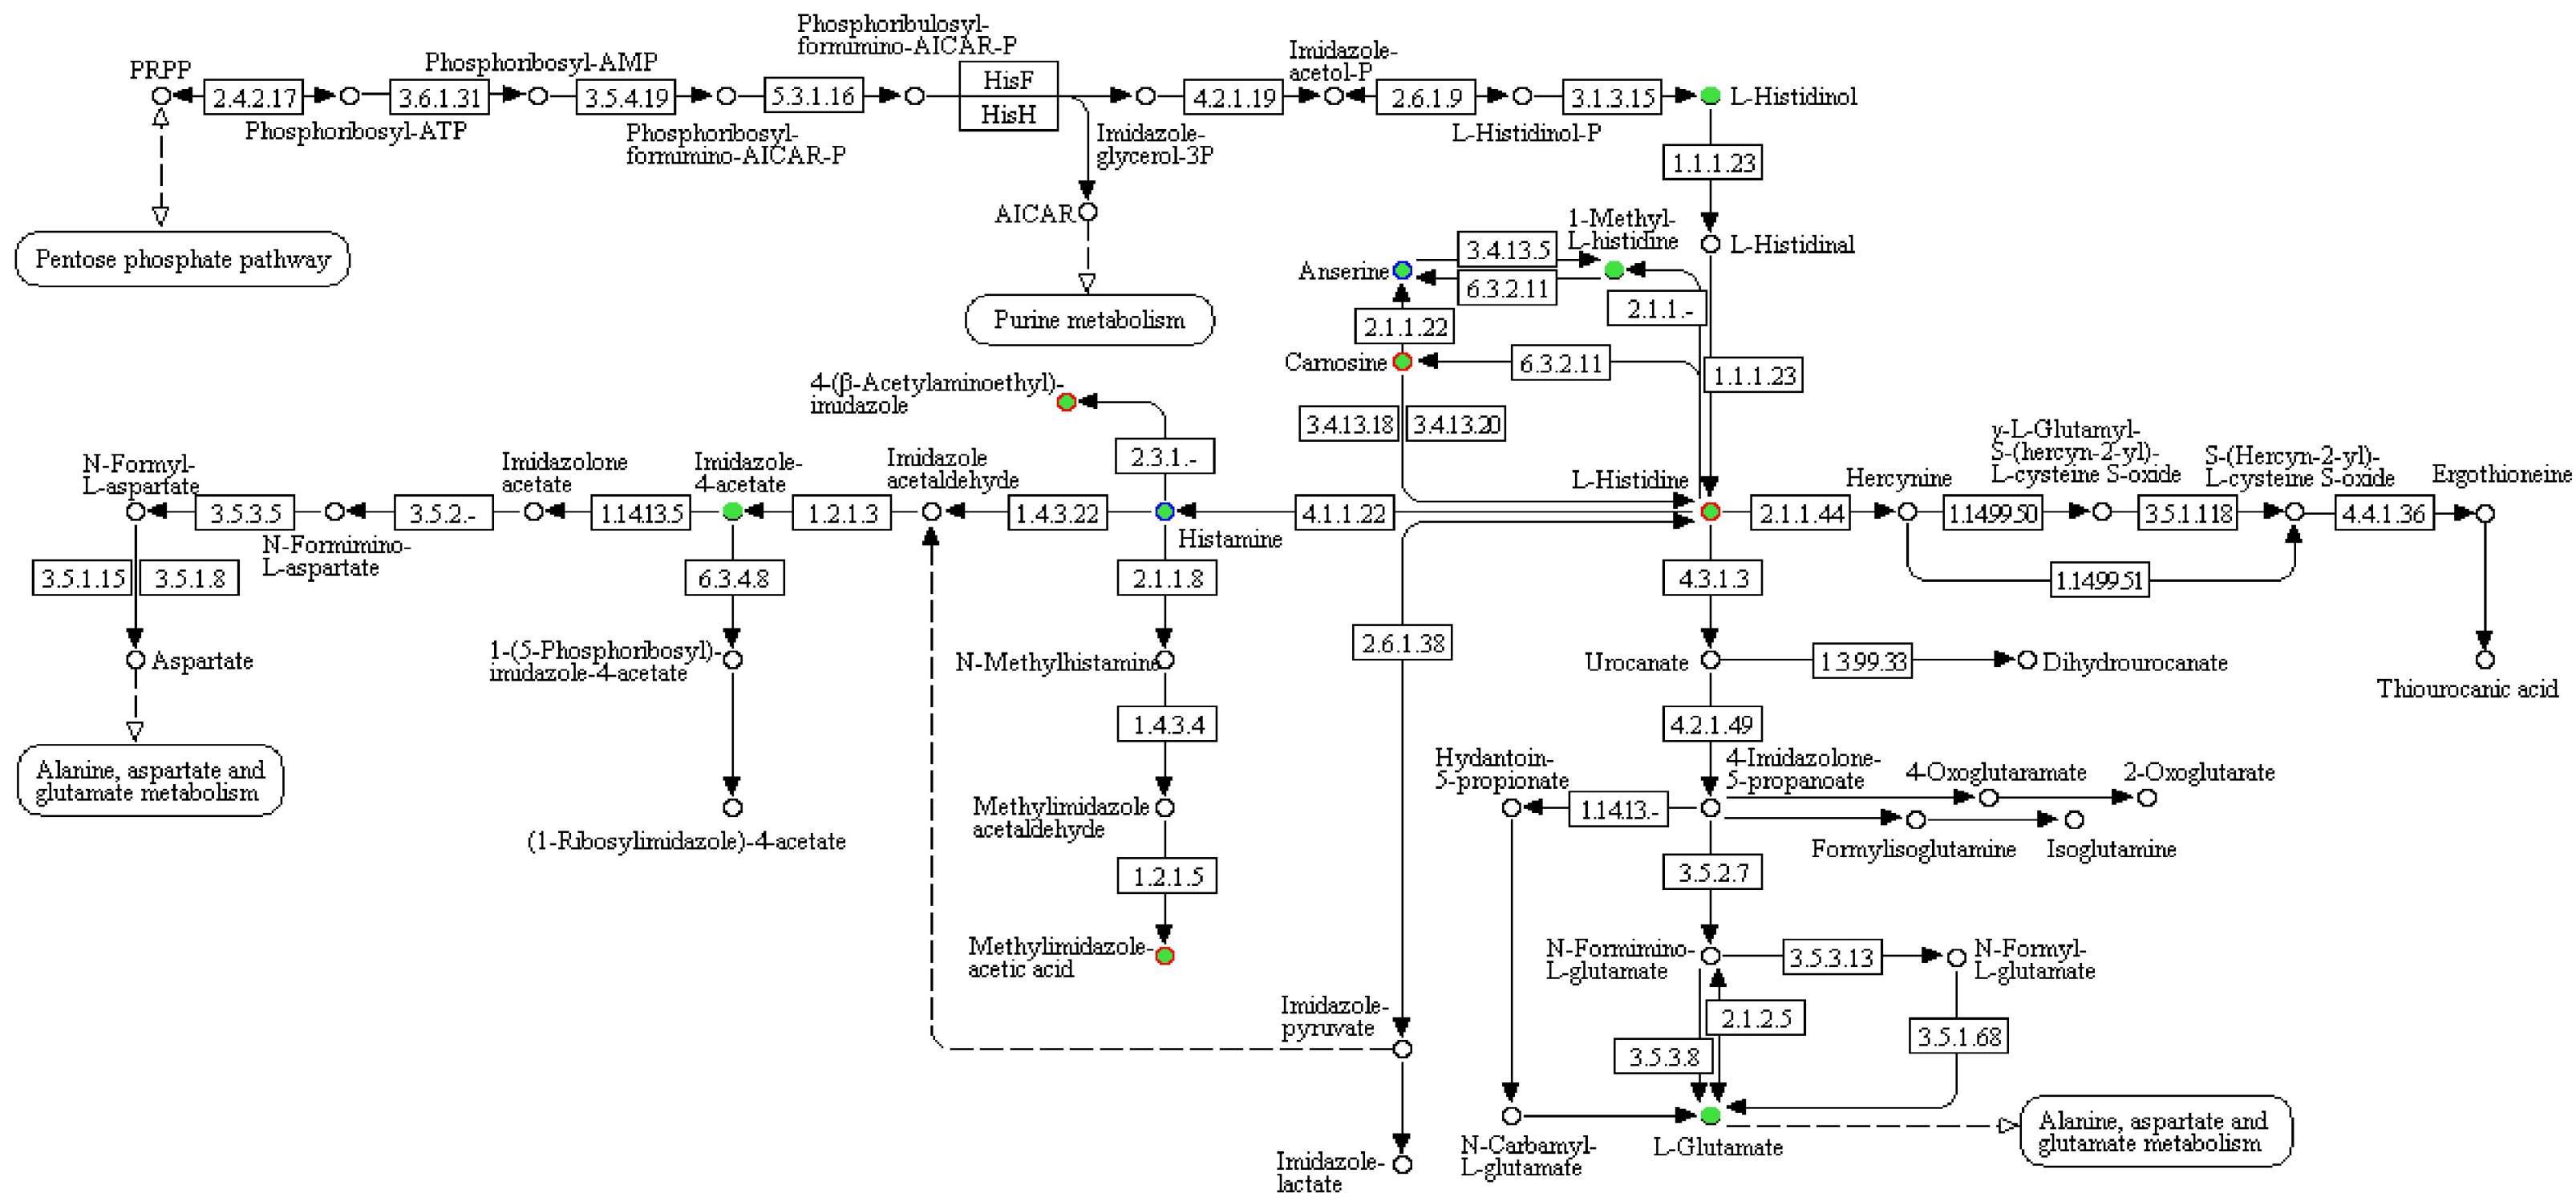

Supplement: Supplementary file 9 [file supplementary]

## TYROSINE METABOLISM

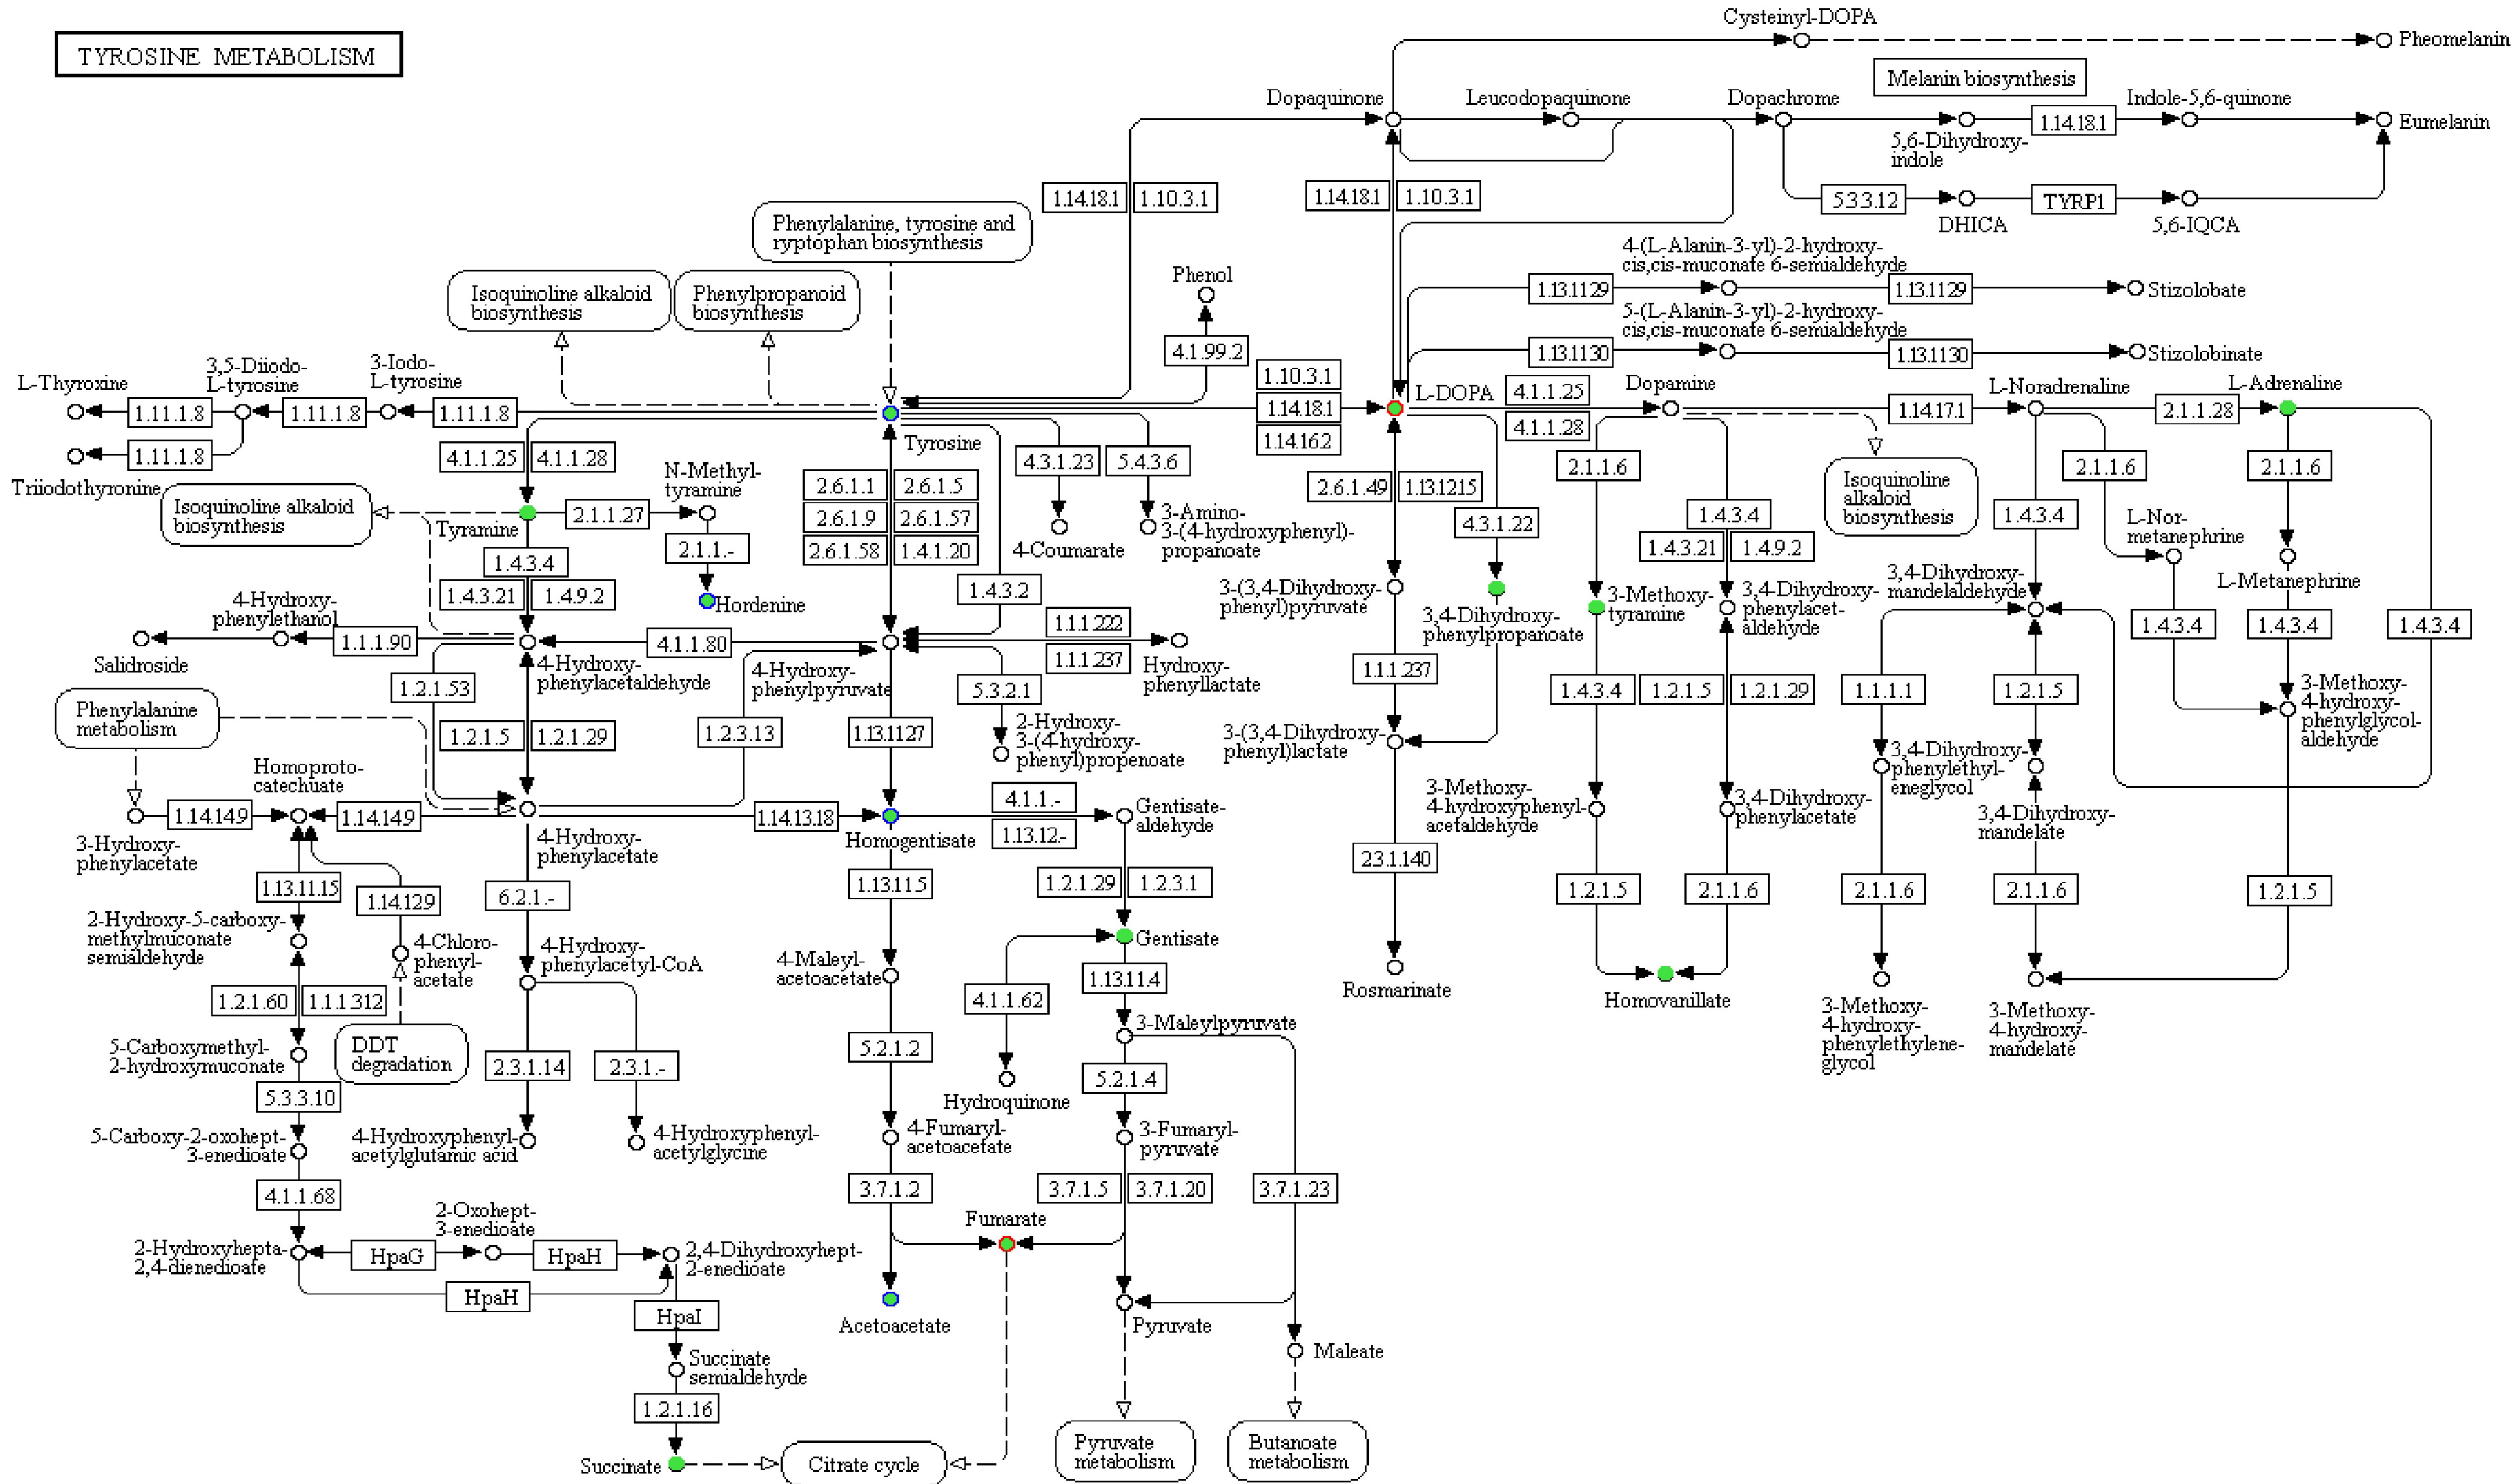

Supplement: Supplementary file 10 [file supplementary]

A

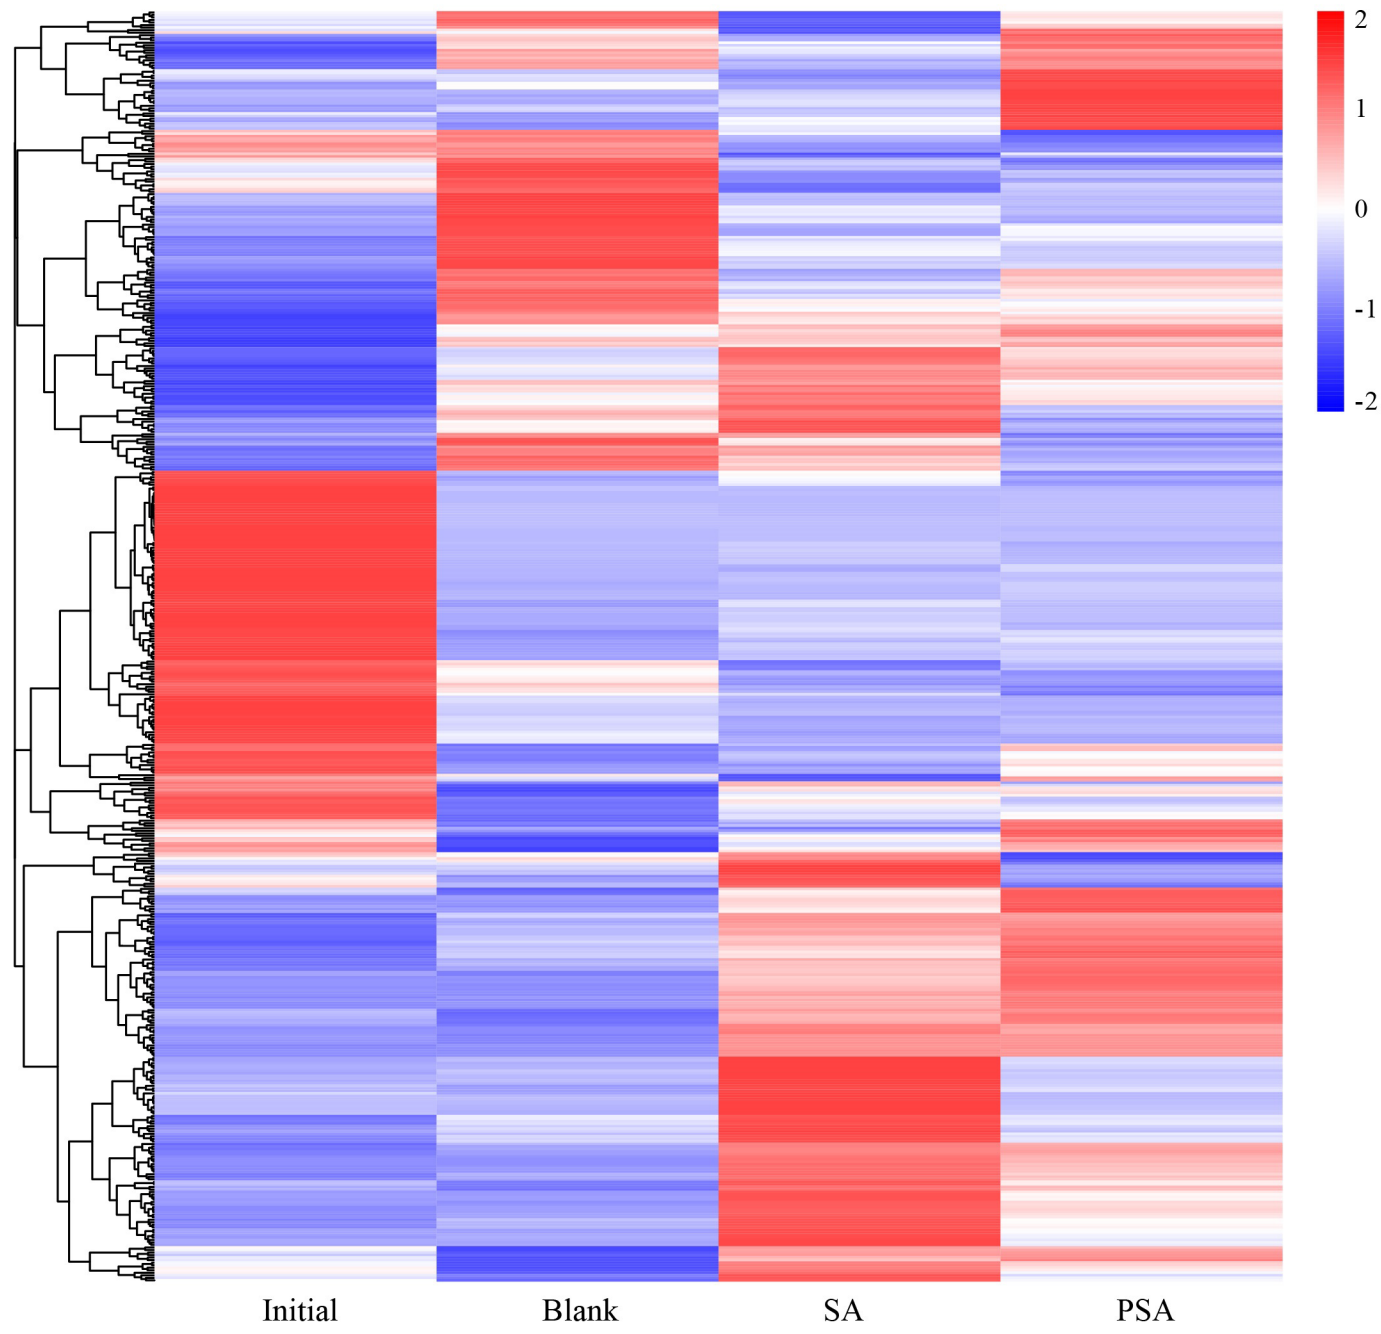

B

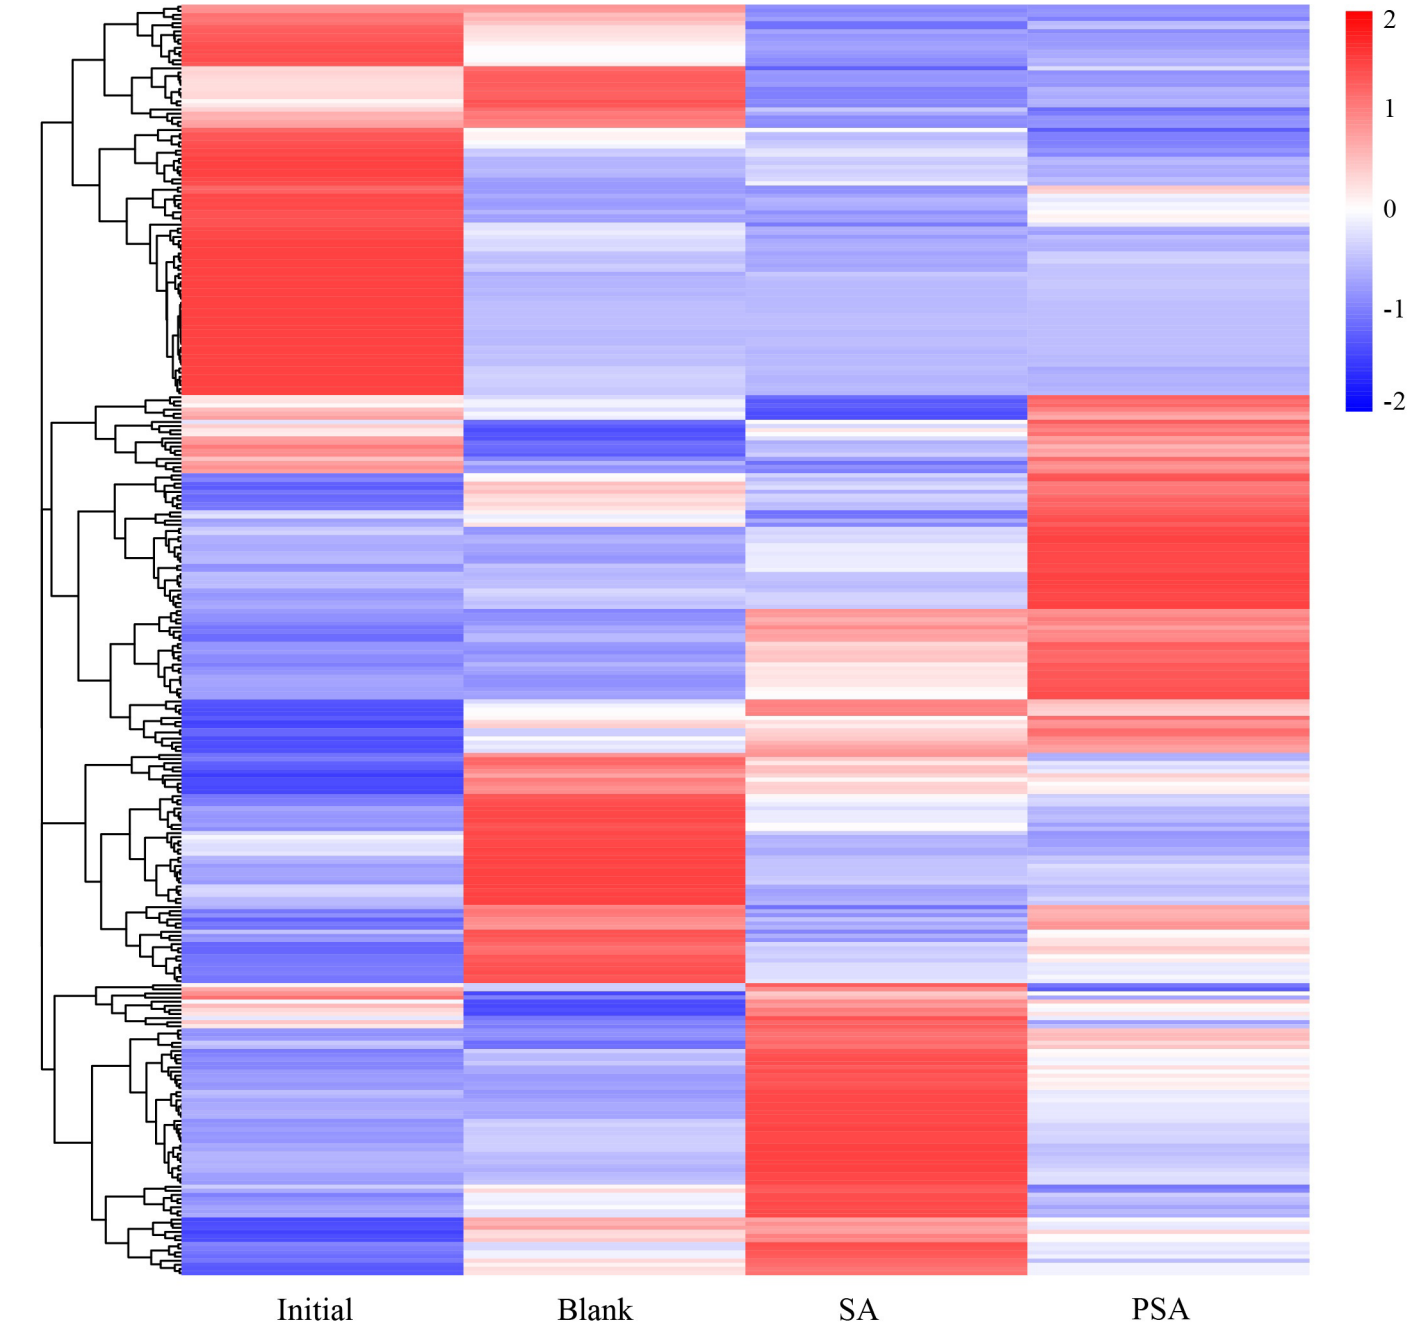

Supplement: Supplementary file 11 [file supplementary]
